# Supplementary figures and images for: The fabrication of monodisperse polypyrrole/SBA-15 composite for the selective removal of Cr(vi) from aqueous solutions
Source: Royal Society of Chemistry journal article supplement (doi:10.1039/d1nj00717c), 2021-01-01

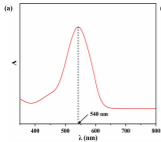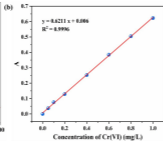

Supplement: d1nj00717c2.pdf [file d1nj00717c2.pdf]
